# Supplementary material for: Creatine supplementation enhances immunological function of neutrophils by increasing cellular adenosine triphosphate
Source: PubMed Central journal article supplement — Biosci Microbiota Food Health. 2022 Jun 17;41(4):185–94. doi: 10.12938/bmfh.2022-018 (PMC9533032; doi:10.12938/bmfh.2022-018), 2022-06-17

## Supplemental information

### Supplementary Fig. 1. Transition of intracellular creatine and ATP concentration in neutrophils

Neutrophils ( $1.0 \times 10^7/\text{mL}$ ) were treated with or without creatine (1.675, 3.35, 6.7, 13.4, 26.8 and 53.6 mM) at 37°C for 6 h, then intracellular creatine (A) and ATP (B) concentrations were measured in each culture. The cumulative data were shown eight (A) and six (B) samples in three independent experiments. One-way ANOVA was used to analyze data for significant differences.  $*p < 0.05$ ,  $**p < 0.01$  and  $***p < 0.001$  were regarded as significant.

### Supplementary Fig. 2. Transition of serum creatine concentration

The mice received i.p. injection of saline (- ; 200  $\mu\text{l}$ ) or creatine solution (200  $\mu\text{l}$  of 5, 10, 25, 50, 100 and 200 mg/mL) every 24 h for 7 days. The peripheral blood was collected at day 7 and serum was separated for the measurement of creatine concentration. The cumulative data were shown eight samples in three independent experiments. One-way ANOVA was used to analyze data for significant differences.  $*p < 0.0001$  was regarded as significant.

### Supplemental figure 1 Transition of intracellular creatine and ATP concentration in neutrophils

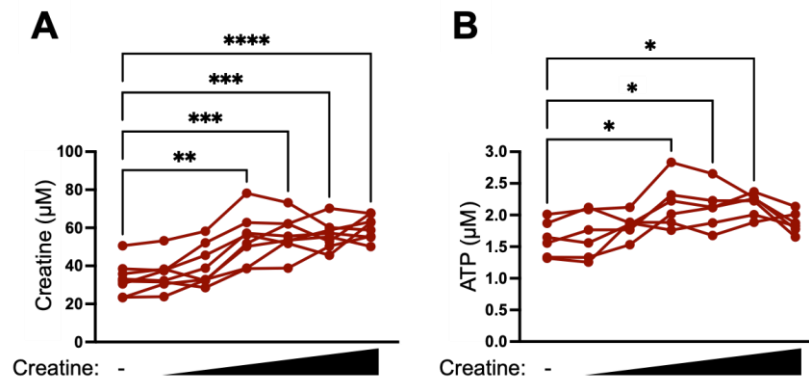

### Supplemental figure 2 Transition of serum creatine concentration

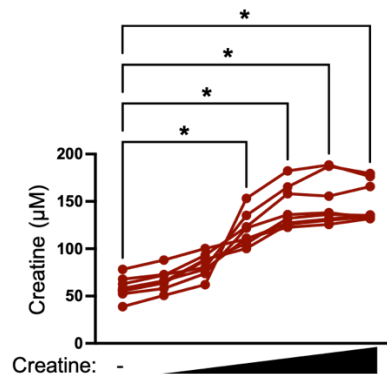

Supplement: bmfh-41-185-s001.pdf [file bmfh-41-185-s001.pdf]
